# Supplementary material for: Prediction of Structure and Molecular Interaction with DNA of BvrR, a Virulence-Associated Regulatory Protein of Brucella
Source: MDPI journal article supplement (doi:10.3390/molecules24173137), 2019-08-29
Supplement: s1 [file s1]

## Supplementary Information S9.

**Table S1** | Motif obtained with *Gibbs Recursive Sampling* with the most optimal result.

| Left<br>Localization | Motif                   | Right<br>Localization | Probability | Forward<br>motif (F) o<br>Reverse<br>motif (R) | Gene                                         | Gene ID   |
|----------------------|-------------------------|-----------------------|-------------|------------------------------------------------|----------------------------------------------|-----------|
| 75                   | cgaag AGAAATTGCC ggacg  | 84                    | 0.96        | F                                              | Lipoprotein                                  | BAB1_2147 |
| 162                  | atgac GAAAAC TGCC ----- | 171                   | 0.93        | F                                              | Heat Shock Protein                           | BAB1_1821 |
| 67                   | taagc AAAAAATGCC cggga  | 58                    | 0.97        | R                                              | Cell wall surface protein                    | BAB2_1107 |
| 17                   | cagac GGAAATTGCG ccaag  | 8                     | 0.96        | R                                              | Acyltransferase FabF                         | BAB1_0872 |
| 19                   | cctgg AAGAAATGCC aaagc  | 10                    | 0.90        | R                                              | Methyltransferase Cfa                        | BAB1_0476 |
| 40                   | tgacg GAAAAC TGCC tggaa | 49                    | 0.93        | F                                              | Methyltransferase Cfa                        | BAB1_0476 |
| 75                   | gcgag GGGAATTGCC cggcc  | 84                    | 0.86        | F                                              | Nitric oxide reductase NorC                  | BAB2_0955 |
| 98                   | cccg c AGAAAATGCG gccgg | 89                    | 0.97        | R                                              | Nitric oxide reductase NorC                  | BAB2_0955 |
| 122                  | taact AAAAAATGCG tcccc  | 113                   | 0.97        | R                                              | Phosphoenolpyruvate<br>carboxykinase         | BAB1_2091 |
| 169                  | ---tg AAAAACTGCG actac  | 160                   | 0.94        | R                                              | Negative exopolysaccharide<br>regulator ExoR | BAB1_0891 |
| 54                   | tcgat GGAAAATGCG ccaaa  | 63                    | 0.96        | F                                              | Transcriptional regulator OmpR               | BAB2_0762 |
| 48                   | ccgct GAAAATTGCG ctaaa  | 57                    | 0.96        | F                                              | Transcriptional regulator GntR               | BAB1_1397 |

**Table S2** | Motif obtained with Gibbs Recursive Sampling with the result with a probability greater than 50%.

| Left<br>Localization | Motif                   | Right<br>Localization | Probability | Forward<br>motif (F)<br>o Reverse<br>motif (R) | Gene                                         | Gene ID   |
|----------------------|-------------------------|-----------------------|-------------|------------------------------------------------|----------------------------------------------|-----------|
| 36                   | gcggc ACGAAATGCC ccatt  | 27                    | 0.52        | R                                              | Outer membrane protein<br>Omp25a             | BAB1_0722 |
| 97                   | ggtta ACGAAATGCG accag  | 88                    | 0.52        | R                                              | L, D transpeptidase                          | BAB1_0589 |
| 75                   | cgaag AGAAATTGCC ggacg  | 84                    | 0.96        | F                                              | Cell wall hydrolase                          | BAB1_2147 |
| 162                  | atgac GAAAAC TGCC ----- | 171                   | 0.79        | F                                              | Heat shock protein HtpX                      | BAB1_1821 |
| 67                   | taagc AAAAAATGCC cggga  | 58                    | 0.96        | R                                              | Cell wall surface protein                    | BAB2_1107 |
| 17                   | cagac GGAAATTGCG ccaag  | 8                     | 0.97        | R                                              | Acyltransferase FabF                         | BAB1_0872 |
| 19                   | cctgg AAGAAATGCC aaagc  | 10                    | 0.87        | R                                              | Methyltransferase Cfa                        | BAB1_0476 |
| 40                   | tgacg GAAAAC TGCG tggaa | 49                    | 0.81        | F                                              | Methyltransferase Cfa                        | BAB1_0476 |
| 75                   | gcgag GGGAATTGCC cggcc  | 84                    | 0.87        | F                                              | Nitric oxide reductase NorC                  | BAB2_0955 |
| 98                   | cccgc AGAAAATGCG gccgg  | 89                    | 0.99        | R                                              | Nitric oxide reductase NorC                  | BAB2_0955 |
| 16                   | ggctt GCGAATTGCG taggt  | 7                     | 0.53        | R                                              | Glutaminase R                                | BAB2_0863 |
| 122                  | taact AAAAAATGCG tcccc  | 113                   | 0.97        | R                                              | Phosphoenolpyruvate<br>carboxykinase         | BAB1_2091 |
| 169                  | tg AAAAACTGCG actac     | 160                   | 0.82        | R                                              | Negative exopolysaccharide<br>regulator ExoR | BAB1_0891 |
| 54                   | tcgat GGAAAATGCG ccaaa  | 63                    | 0.96        | F                                              | Transcriptional regulator<br>OmpR            | BAB2_0762 |
| 48                   | ccgct GAAAATTGCG ctaaa  | 57                    | 0.95        | F                                              | Transcriptional regulator GntR               | BAB1_1397 |

**Table S3** | Motif obtained with *Gibbs Recursive Sampling* limiting to three motifs per sequence and to three different motifs in total.

| Left<br>Localization | Motif                  | Right<br>Localization | Probability | Forward<br>motif (F)<br>o Reverse<br>motif (R) | Gene                                | Gene ID   |
|----------------------|------------------------|-----------------------|-------------|------------------------------------------------|-------------------------------------|-----------|
| 37                   | cggtc GCGCAGAACC cttct | 28                    | 0.90        | R                                              | Nitric oxide reductase<br>NorC      | BAB2_0955 |
| 102                  | atccc CCGCAGAAAA tgcgg | 93                    | 0.87        | R                                              | Nitric oxide reductase<br>NorC      | BAB2_0955 |
| 133                  | tcatt GGCCGGAACC atcgc | 124                   | 0.94        | R                                              | Nitric oxide reductase<br>NorC      | BAB2_0955 |
| 9                    | tcagc CGGCAGATCA tcgag | 18                    | 0.59        | F                                              | Serine kinase of the HPr<br>protein | BAB1_2094 |
| 43                   | gctga CGGCGGAAAA tatta | 52                    | 0.91        | F                                              | Serine kinase of the HPr<br>protein | BAB1_2094 |
| 116                  | gcgct GGCCGGAAGA tcaac | 107                   | 0.78        | R                                              | Serine kinase of the HPr<br>protein | BAB1_2094 |
| 74                   | gccag CGCCGGAACA atcat | 65                    | 0.94        | R                                              | ABC transporter                     | BAB1_0241 |
| 117                  | agtca GGCCGGAAC gaggt  | 108                   | 0.91        | R                                              | ABC transporter                     | BAB1_0241 |
