# Supplementary material for: Prediction of Structure and Molecular Interaction with DNA of BvrR, a Virulence-Associated Regulatory Protein of Brucella
Source: MDPI journal article supplement (doi:10.3390/molecules24173137), 2019-08-29

## Supplemental information S4

### Verify 3D results for BvrR

#### Verify 3D results

85.77% of the residues have  
averaged 3D-1D score  $\geq 0.2$

**Pass**

At least 80% of the amino acids have scored  $\geq 0.2$  in the 3D/1D profile.

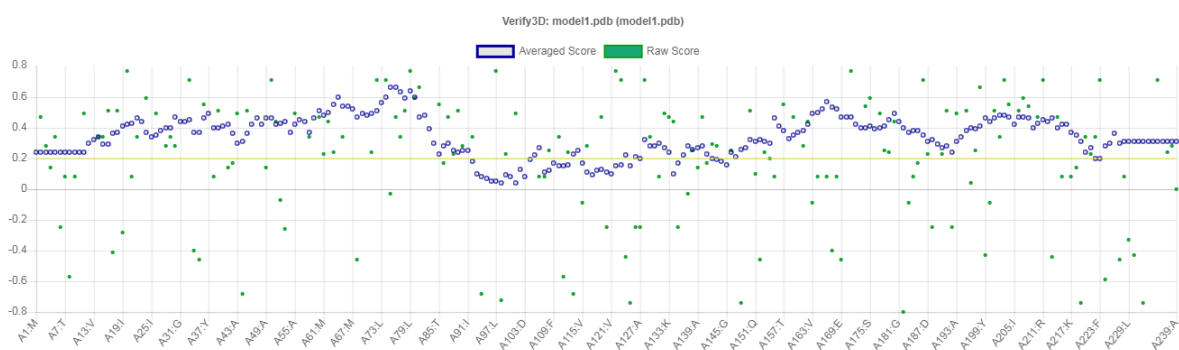

Supplement: s1 [file s1]
