# Supplementary material for: Prediction of Structure and Molecular Interaction with DNA of BvrR, a Virulence-Associated Regulatory Protein of Brucella
Source: MDPI journal article supplement (doi:10.3390/molecules24173137), 2019-08-29
Supplement: s1 [file s1]

**Table S4. Sequences of genes with the AAHTGC motif.** (The start codon is shown remarked in yellow and the motif remarked in purple)

| Gene ID   | Sequence                                                                                                                                                                                                                                                                                                                                                                                                                                                                                                                                                            |
|-----------|---------------------------------------------------------------------------------------------------------------------------------------------------------------------------------------------------------------------------------------------------------------------------------------------------------------------------------------------------------------------------------------------------------------------------------------------------------------------------------------------------------------------------------------------------------------------|
| BAB1_2147 | GCGGTGCGGCCAAGGCGGGGATTTGACCTTTTCGCCTTTTTTTGGCCTAAAAATTCCAAAACCTTGCATGCGAAGAGA <span style="background-color: #FF00FF;">AATTGC</span> CGGACGTTGATTTTGATCCTGTCCGCTTTGACTTGCACCCCAGCCGGATCGTTCGGATATTTCCGGG <span style="background-color: #FFFF00;">ATG</span> GCTGGATCAGTTAAGGGT<br>CGCCAGCGCGGTTCCGCCCTAAACTGGAAAGCGGAAAAAAACCGGATTTTTTAAGGTTTTTGGAACGTACGCTTCTCTTTAACGGCCTGCAACTAAAACTAGGACAGGCGAAACTGAACGTGGGGTCGGCCTAGCAAGCCTATAAAGGCC <span style="background-color: #FFFF00;">TAC</span> CGACCTAGTCAATTCCCA                                                   |
| BAB1_1821 | CGTCGTTATTTTCGCTCATCGATAACATTCCAATTCTCGGCTTTGCCACAAATATTGAAGCGAAGCTTTTTCATACCCATCATATAGGCAGAAAGGCTTGCCGTGCAAAACCGTTTGACGGGCAATTGCCAGATTTGGAGACCGCCACGG <span style="background-color: #FFFF00;">ATG</span> AATATGACGAA <span style="background-color: #FF00FF;">AACTGCC</span><br>GCAGCAATAAAAGCGAGTAGCTATTGTAAGGTTAAGAGCCGAAACGGTGTTTATAACTTCGCTTCGAAAAAGTATGGGTAGTATATCCGTCTTCCGAACGGCACGTTTGGCAAACCTGCCCGTTAACGGTCTAAACCTCTGGCGGTGCC <span style="background-color: #FFFF00;">TAC</span> TTATACTGCTTTTGACGG                                                      |
| BAB2_1107 | GATCACCTATAAACCTCTGGGATGATGTTGAAATGCAGTTGCATCAACATGATCCCGGGCATTTTTTTGCTTATGAATAACAGAATACTCGTACCTCCCTTTTTGAAATGACCGCGAATTGATGTGGTAAATGACAGAGGCGGGGTTGAGAT <span style="background-color: #FFFF00;">ATG</span> CCTAATTTGGCCAATCAG<br>CTAGTGGAATTTTGGAGACCCTACTACAACCTTACGTCAACGTAGTTGTACTAGGGCC <span style="background-color: #FF00FF;">CGTAAA</span> AAACGAATACTTATTGTCTTATGAGCATGGAGGGAAACCTTACTGGCGCTTAACCTACACCATTTACTGTCTCCGCCCCAACTCTA <span style="background-color: #FFFF00;">TAC</span> GGATTAAACCGGTTAGTC                                                  |
| BAB1_0872 | CGCTTGGCGCAATTTCCGTCTGGAAGGCGAAGCCTTCGCCCCGTGGATGCTTCGGAAGCCTGCCAGTGGCGCGGTGACGGAAGCCATTGTACCACCATCGGGGCAACCCGCGCTGAAGGCGCAGCAAAGCTGGTGAGAGCATAAG <span style="background-color: #FFFF00;">ATG</span> ACGAAATATACAGACCAT<br>GCGAACCG <span style="background-color: #FF00FF;">CGTTAA</span> AGGCAGACCTTTCGCTTCGGAAGCGGGGCGACCTACGAAGCCTTTTTCGGACGGTCACCGCGCCAGTCGCTTCGGTAACAGTGGTGGTAGCCCCGTTGGGCGCGACTTCCGCGTCGTTTCGACCCTCTCGTATT <span style="background-color: #FFFF00;">TAC</span> TGCTTTATATGTCTGGTA                                                           |
| BAB1_0476 | TGTTGCTTTGGCATTCTTCCAGGGCCGGTTGATTGACGGAA <span style="background-color: #FF00FF;">AACTGC</span> CTGGAAATTTGACGGCAGAGGGGCTTCTTTTGATAATGCCGCTGCCGGGCAGCAGCATGGATGTATGCACCTGCTTCGTTCCCAAAGAGGAGATGGGGCCG <span style="background-color: #FFFF00;">ATG</span> TATGGAATGCTGCGTACA<br>ACAACGAAAC <span style="background-color: #FF00FF;">CGTAAA</span> GAAGTCCC GGCCAACTAACTGCCTTTTGACGGACCTTTAAACTGCCGTCTCCCCGAAGAAACTATTACGGCGGACGGCCCCGTGCTGCTACCTACATACGTGGACGAAGCAAGGGTTTCTCCTCTACCCCGGC <span style="background-color: #FFFF00;">TAC</span> ATACCTTACGACGCATGT    |
| BAB2_0955 | CTGCATCTTTGCCTATTCGCAAAGAAGGGTTCTGCGCGACCGATAGAATGGAAGCATCCCGCGGGGCCGGCGAGGGG <span style="background-color: #FF00FF;">AATTGC</span> CCGGCCGCATTTTCTGCGGGGGATTGGCTGCCGGAGCGATGGTTCCGGCCAATGAAAGGACGAAGGG <span style="background-color: #FFFF00;">ATG</span> GCAGAACGCCTAACCAAG<br>GACGTAGAAACGGATAAGCGTTTTCTTCCCAAGACGCGCTGGCTATCTTACCTTCGTAGGGCGCCCCGGCCGCTCCCCTTAACGGGCGCGG <span style="background-color: #FF00FF;">CGTAAA</span> AGACGCCCCCTAACCGACGGCCTCGCTACCAAGGCCGGTTACTTTCTGCTTCCC <span style="background-color: #FFFF00;">TAC</span> CGTCTTGCGGATTGGTTC |
| BAB1_2091 | CGGGTTAAACGATTTAAAAAAATTTCAAAAATTTTAAATCGATTAAATATTTGAATTTTCTCAATTAATCTGTTTCTGACTGCCATCCCCCATGAAAGCCAAACCAGGGGGACGCATTTTTTTAGTTAGTCAAACAGACGGCGGAGACATC <span style="background-color: #FFFF00;">ATG</span> AAAGAGACCGGCATCCAC<br>GCCAATTTTGCTAAATTTTTTTAAAGTTTTTAAATTTAGCTAATTTATAAACTTAAAAGAGTTAATTAGACAAAGACTGACGGTAGGGGGTACTTTCGGTTTGGTCCCCCTG <span style="background-color: #FF00FF;">CGTAAAA</span> AAATCAATCAGTTTGCTTGCCGCCTCTGTAG <span style="background-color: #FFFF00;">TAC</span> TTTCTCTGGCCGTAGGTG                                                   |
| BAB1_0891 | GAGCAGAAAAAATCTGCCCGTTTGCTGTGCGCTCCGCCGAAGCGAGCTGAGCTTTTTTCCGTCAAGATCGGGTCTCACTGTTGACGAAAAGCAGGCGCAACCTGCCTTTTCATGATCTTTTCCGTTCCATATGAAAGACCGGCGTTGTG <span style="background-color: #FFFF00;">ATG</span> CGTAGTCGCAGTTTTTTCA<br>CTCGTCTTTTTTAAGACGGGCAAACGGACAGCGGAGGCGGCTTCGCTCGACTCGAAAAAAGGCAGTTCTAGCCCAGAGTGACAACCTGCTTTTTCGTCCGCGTTGGACGGAAAGTACTAGAAAAGGCAAGGTATACTTTCTGGCCGCAACAC <span style="background-color: #FFFF00;">TAC</span> GCATCAG <span style="background-color: #FF00FF;">CGTCAA</span> AAAGT                                                  |
| BAB2_0762 | AACGCCTATGCGGGGAAATCAGCCAGTAGGCTGATTTCTGATCCGGCTTCGATGGA <span style="background-color: #FF00FF;">AAATGC</span> GCCAAACAAATAGTTAGAGCAGTTCGCCGTTTCTGTTAAAAATAGGAAACGCTACAATACCCACCCCAACGGCAATGGAACAGCAAA <span style="background-color: #FFFF00;">TTG</span> AAAGAAGACGCCACATT<br>TTGCGGATACGCCCTTTAGTCGGTCATCCGACTAAAGACTAGGCCGAAGCTACCTTTTACGCGGTTTTGTTTTATCAATCTCGTCAAGGCGGCAAAGACAATTTATCCTTTGCGATGTTATGGGTGGGGTTGCCGTTACCTTGTGTTTT <span style="background-color: #FFFF00;">AAC</span> TTTCTTCTGCGGGTGTA                                                        |
| BAB1_1397 | AATATCTTTATTCCATAGAAACATGGGAAAAGCTGTTCTCGTCCGCTGAA <span style="background-color: #FF00FF;">AATTGC</span> GCTAAACCACCATCGTCAATAGCTGGGTTTGAGGAGACTTCGCTATTACAAGTTCCGCTGCAAGAGGCGGATAGTCTAATTGAGGAGACTTCCC <span style="background-color: #FFFF00;">GTG</span> TTGGACTGGGAAAATGTA<br>TTATAGAAATAAGGTATCTTTGTACCCTTTTCGACAAGAGCAGGCGACTTTTAAACGCGATTGGTGGTAGCAGTTATCGACCCAAACTCCTCTGAAGCGATAATGTTCAAGGCGACGTTCTCCGCCTATCAGATTAACCTCCTCTGAAGGG <span style="background-color: #FFFF00;">CAC</span> AACCTGACCTTTTACAT                                                    |
| BAB1_0722 | CTCGACAGATTATCTCCACACAATGGGGCATTTCGTGCCGCAATTACCCTCGATATGTACCCCTGTGACGCGGCATGGGCGGTTTACTCCCATGCTGCCCCGCCGATAAGGGACCGCGCAAAACGTAATTTGTGTAAGGAGAATGCC <span style="background-color: #FFFF00;">ATG</span> CGCACTCTTAAGTCTCTC<br>GAGCTGTCTAATAGAGGTGTGTTACCC <span style="background-color: #FF00FF;">CGTAAA</span> GCACGGCGTTAATGGGAGCTATACAGTGGGGACAGTCGCGCGGTACCCGCCAAATGAGGGCTACGACGGGCGGGCTATTCCCTGGCGCGTTTTGCATTAAACACATTCTCTTACGG <span style="background-color: #FFFF00;">TAC</span> CGGTGAGAATTCAGAGAG                                                        |
| BAB1_0589 | CTCACAAACGTGCAACCCAGCCGTGCATCAAGCAGCGGCCCATGCAAATTCAACTGTTACCGCGCACCGACCACCCCGGTCTGGTCGCATTTTCGTTAACCTTAAACGTTGTATCTCTATCCCTCTCCCATCATCAATCTGGTTTTTCAT <span style="background-color: #FFFF00;">ATG</span> CAAACGACCTTACCCGC<br>GAGTGTTTGACGCTTGGGTGCGCACGTAGTTCTGTCGCCGGTACGTTTAAAGTTGACAAGTGGCGCGTGGCTGGTGGGGGCCAGACCAG <span style="background-color: #FF00FF;">CGTAAA</span> GCAATTGGAATTTGCAACATAGAGATAGGGAGAGGGTAGTAGTTAGACCAAAGTA <span style="background-color: #FFFF00;">TAC</span> GTTTGCTGGGAATGGGCG                                                     |
| BAB2_0863 | TACCTACGCAATTCGCAAGCCGCACTGGAAAACGCCGAAGGGTCGGCCGATTTTGAGCCGTTCAACTGGGAAAAGGAAGGCCGGATGCCGGGTTCCCAGCAAGCCGCAGGCTGAAAAGCCCGTCCTGCAAAAGCTATGGAGACATCTTA <span style="background-color: #FFFF00;">ATG</span> TCAAGCTCATCAGATGCG<br>ATGGATG <span style="background-color: #FF00FF;">CGTTAA</span> GCGTTTCGGGTGACCTTTTGCGGCCTTCCCAGCCGGCTAAAACTCGGCAAGTTGACCCTTTTCCTTCCGGCTACGGCCCAAGGGTCGTTTCGGCGTCCGACTTTTCGGGCAGGACGTTTTCGATACCTCTGTAGAAT <span style="background-color: #FFFF00;">TAC</span> AGTTCGAGTAGTCTACGC                                                     |
