# Supplementary material for: Prediction of Structure and Molecular Interaction with DNA of BvrR, a Virulence-Associated Regulatory Protein of Brucella
Source: MDPI journal article supplement (doi:10.3390/molecules24173137), 2019-08-29

## Supplemental Information S7

### ProSA results for BvrR

Results for bvrR.pdb, chain A (239 aa)

Overall model quality

Z-Score: -7.72

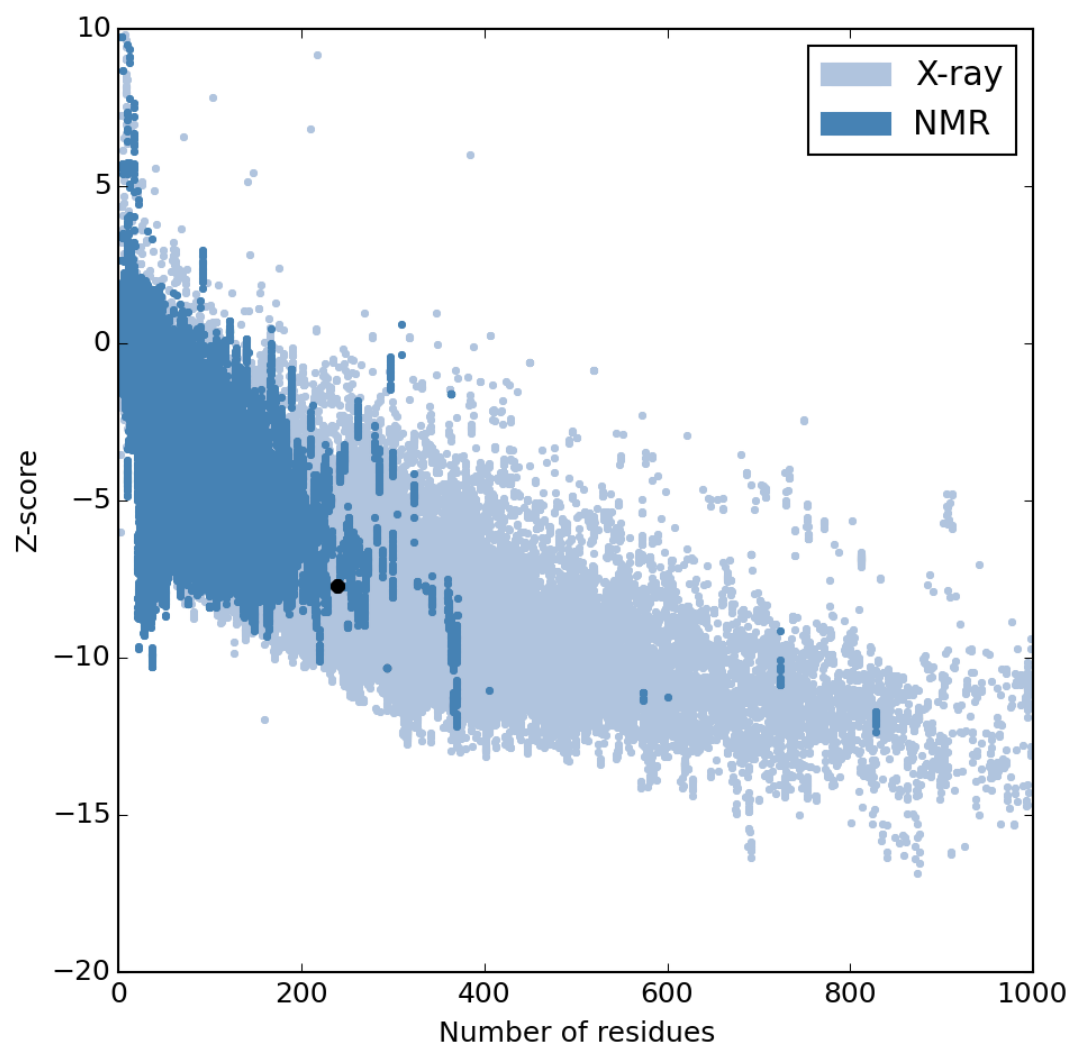

## Local model quality

[HELP](#)

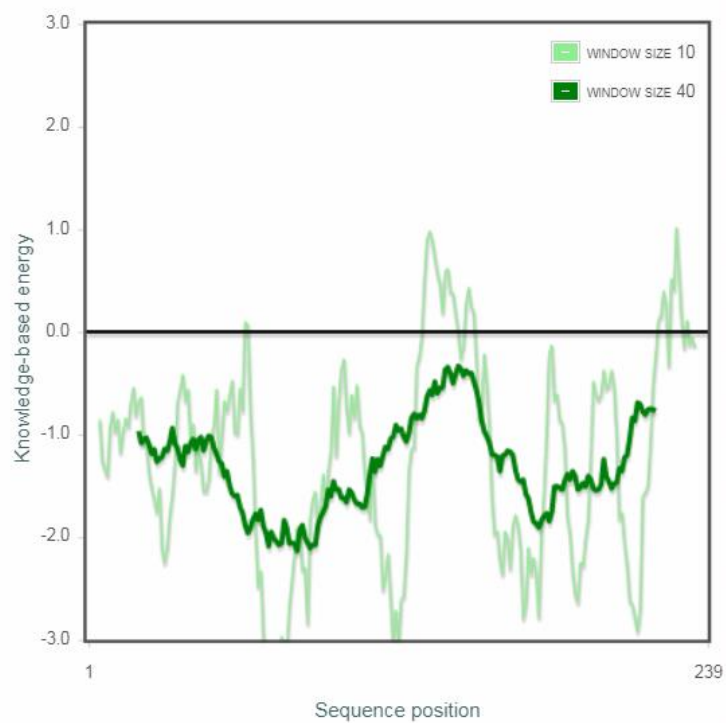

Supplement: s1 [file s1]
