# Supplementary material for: Prediction of Structure and Molecular Interaction with DNA of BvrR, a Virulence-Associated Regulatory Protein of Brucella
Source: MDPI journal article supplement (doi:10.3390/molecules24173137), 2019-08-29

## Supplemental information S6

### PROVE results for BvrR

Input file: **model1.pdb**

• **Job output**

Model 1: 49 buried outlier protein atoms, 5.6% **ERROR**

# PROVE

## 9257206.pdb\_MODEL\_1

### Analysis of entire structure

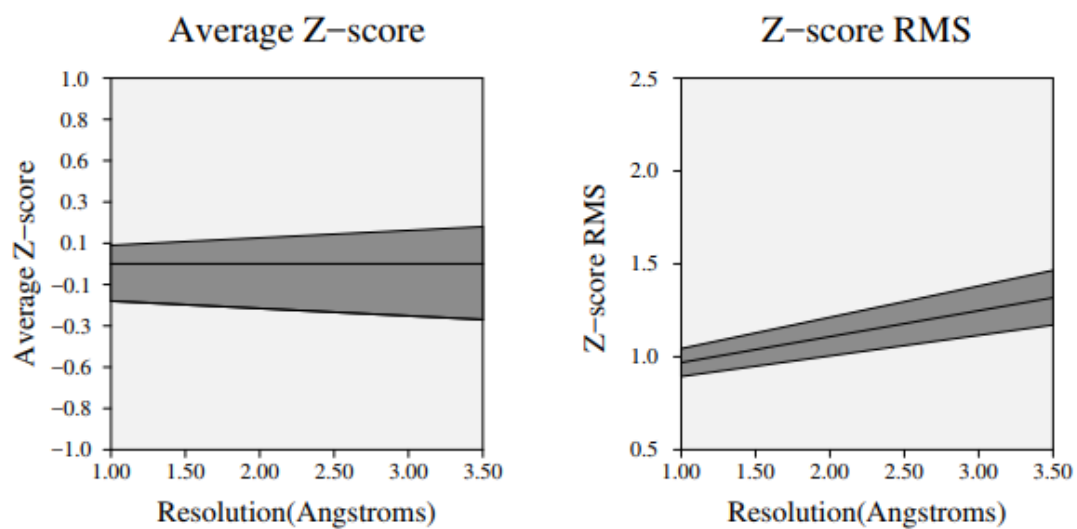

Supplement: s1 [file s1]
