# Supplementary material for: Prediction of Structure and Molecular Interaction with DNA of BvrR, a Virulence-Associated Regulatory Protein of Brucella
Source: MDPI journal article supplement (doi:10.3390/molecules24173137), 2019-08-29

## Supplemental Information S5

### ERRAT results for BvrR

Program: ERRAT2

File: /home/saves/Jobs/9257206/qq\_aaaa.pdb\_errat.logf

Overall quality factor\*\*: 96.537

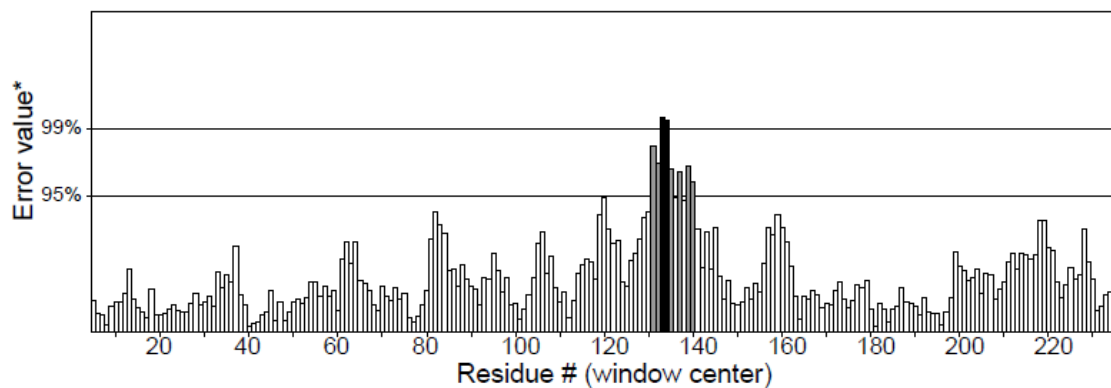

\*On the error axis, two lines are drawn to indicate the confidence with which it is possible to reject regions that exceed that error value.

\*\*Expressed as the percentage of the protein for which the calculated error value falls below the 95% rejection limit. Good high resolution structures generally produce values around 95% or higher. For lower resolutions (2.5 to 3Å) the average overall quality factor is around 91%.

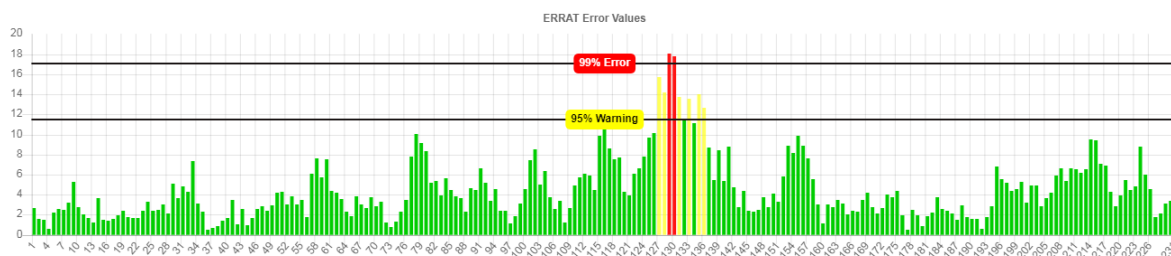

Supplement: s1 [file s1]
