# Supplementary material for: Prediction of Structure and Molecular Interaction with DNA of BvrR, a Virulence-Associated Regulatory Protein of Brucella
Source: MDPI journal article supplement (doi:10.3390/molecules24173137), 2019-08-29
Supplement: s1 [file s1]

# Ramachandran Plot

## 9257206

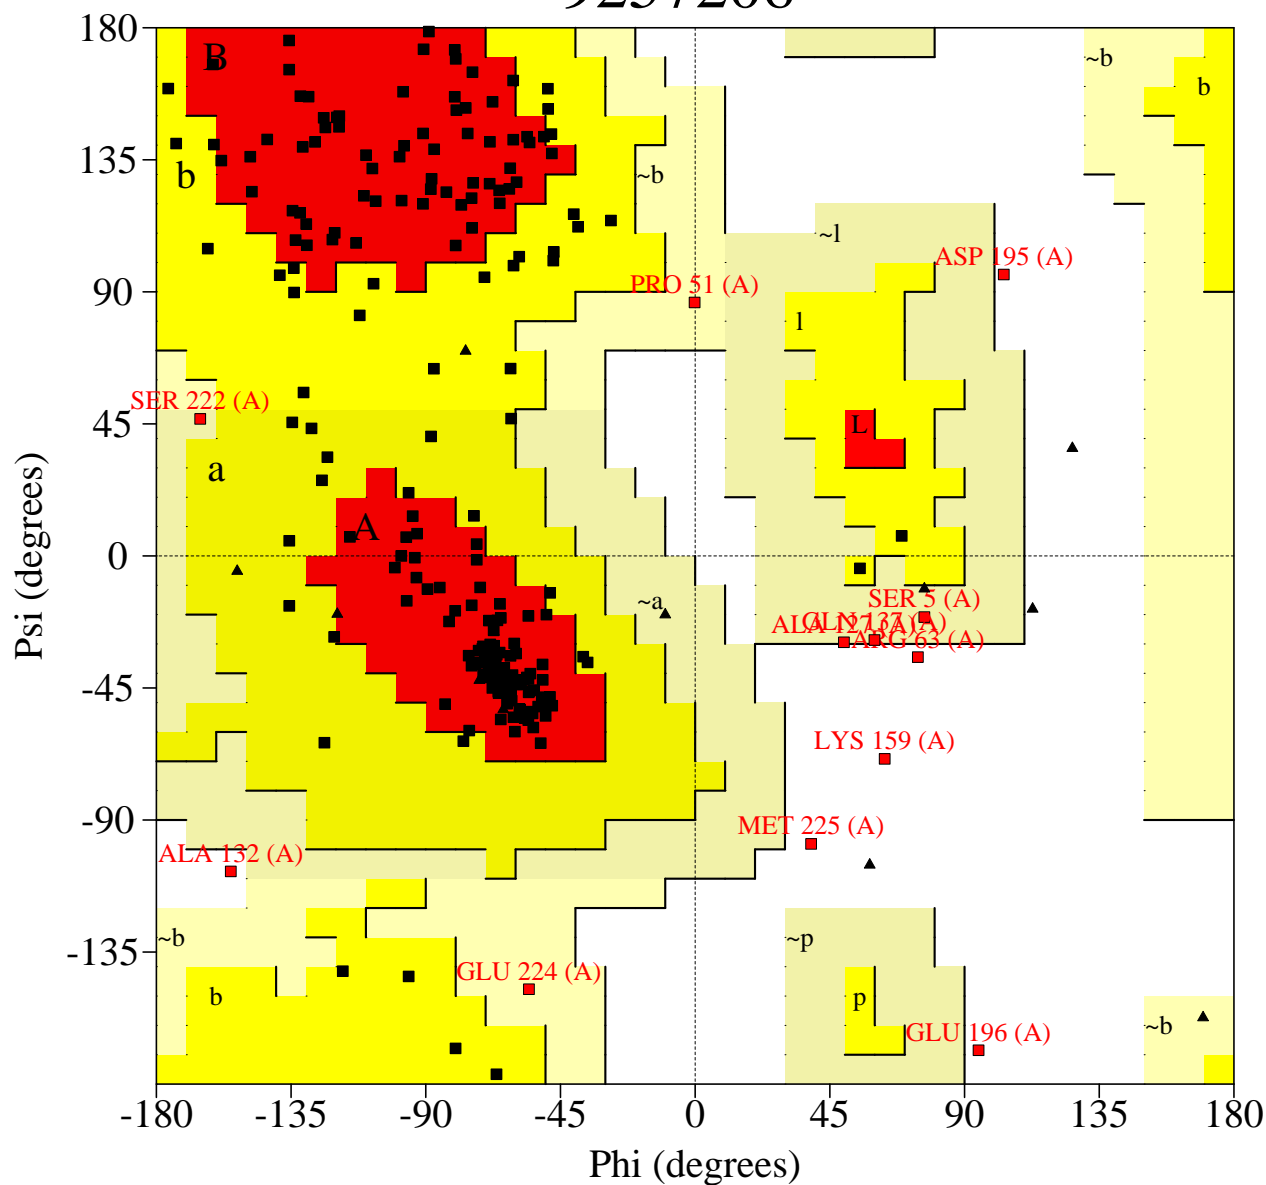

### Plot statistics

|                                                      |     |        |
|------------------------------------------------------|-----|--------|
| Residues in most favoured regions [A,B,L]            | 163 | 75.5%  |
| Residues in additional allowed regions [a,b,l,p]     | 42  | 19.4%  |
| Residues in generously allowed regions [~a,~b,~l,~p] | 5   | 2.3%   |
| Residues in disallowed regions                       | 6   | 2.8%   |
| -----                                                |     |        |
| Number of non-glycine and non-proline residues       | 216 | 100.0% |
| Number of end-residues (excl. Gly and Pro)           | 2   |        |
| Number of glycine residues (shown as triangles)      | 13  |        |
| Number of proline residues                           | 8   |        |
| -----                                                |     |        |
| Total number of residues                             | 239 |        |

Based on an analysis of 118 structures of resolution of at least 2.0 Angstroms and R-factor no greater than 20%, a good quality model would be expected to have over 90% in the most favoured regions.
