# Supplementary material for: Prediction of Structure and Molecular Interaction with DNA of BvrR, a Virulence-Associated Regulatory Protein of Brucella
Source: MDPI journal article supplement (doi:10.3390/molecules24173137), 2019-08-29
Supplement: s1 [file s1]

## Supplemental information S8

**Sequences of the 170 bp segments upstream the start codon of the 32 genes used for the Gibbs Sampling analysis. (The start codon is shown in bold letter).**

| Gene                                         | Sequence                                                                                                                                                                                       |
|----------------------------------------------|------------------------------------------------------------------------------------------------------------------------------------------------------------------------------------------------|
| <i>omp25a</i><br>(BAB1_0722,<br>BAB_RS19375) | CTCGACAGATTATCTCCACACAATGGGGCATTTCGTGCCGCAATTACCCTCGATATGTCACCCCTGTC<br>AGCGCGGCATGGGCGGTTTACTCCCGATGCTGCCCCGCCGATAAGGGACCGCGCAAAACGTAATTT<br>GTGTAAGGAGAATGCC <b>ATG</b> CGCACTCTTAAGTCTCTC   |
| <i>omp25d</i><br>(BAB1_0115,<br>BAB_RS16480) | TAAATTTCAAGTTAATCAAATATATATCAACTTTTTGTATAAATGAAAATCAAGACAATTCATTATTG<br>TTGCTCATTACTACATACATTTCGACCAGATCATCACTATATGCTAGCCGCATTGCAACGCCATTCTT<br>ATTAGGAGTTTTCA <b>ATG</b> ACGTTCAAAAATCTACTT   |
| BAB1_0358,<br>BAB_RS17640                    | CTTGGTCCACGTGTAACCCATAAGCCTCAACAGCCAGATACTCTGCTTATCGTGGATAAAAGTGGGT<br>TGGCAGGGATTGTTCCGTGAAGGATATATTAACCGCGAATTTCCGGTGTAAAGAAAACTTTTTCGGTT<br>CGGCGGACAGGGAAT <b>TTG</b> GATTTCGGCGCATGTGTT   |
| BAB1_0589,<br>BAB_RS18735                    | CTCACAAACGTCGAACCCAGCCGTGCATCAAGCAGCGGCCCATGCAAATTCAACTGTTACCCGCGC<br>ACCGACCACCCCGGTCTGGTCGCATTTTCGTTAACCTTAAACGTTGTATCTCTATCCCTCTCCCATCA<br>TCAATCTGGTTTTTCAT <b>ATG</b> CAAACGACCCTTACCCGC  |
| BAB1_2147,<br>BAB_RS26155                    | GCGGTCGCGCCAAGGCGGGGATTGACCTTTTCGCCTTTTTTGGCCTAAAAATCCAAAACCTTGCA<br>TTCGGAAGAGAAATTGCCGGACGTTGATTTTGATCCTGTCCGCTTTGACTTGACCCCCAGCCGGATCGTT<br>CGGATATTTCCGGG <b>ATG</b> GCTGGATCAGTTAAGGGT    |
| <i>htpX</i><br>(BAB1_1821,<br>BAB_RS24585)   | CGTCGTTATTTTCGCTCATCGATAACATTCCAATTCTCGGCTTTGCCACAAATATTGAAGCGAAGCTT<br>TTTCATACCCATCATATAGGCAGAAAGGCTTGCCGTGCAAAACCGTTTGACGGGCAATTGCCAGATT<br>TGGAGACCGCCACGG <b>ATG</b> AATATGACGAAAACCTGCC  |
| <i>moxR</i><br>(BAB1_1573,<br>BAB_RS23420)   | CTTCCTTGCCGCCGGGGGTGCTTTTATCATCCGACTCGGTTATTCCTGCGCAAATAGACTTAAAGCC<br>ATGAAATAGTCACCCTTTCACGGCTTGTCACTATTATATAGCGATTATGAAGCAGTTCGCCCAGAG<br>CATTGCGAGGTCCATAT <b>ATG</b> AGCGTTGCCGTTACGCCT   |
| <i>clpB</i><br>(BAB1_1868,<br>BAB_RS24840)   | TTTTTATTTGGATTTTCCGATGCCTGCCGGTCTTGCCGAAAGAGGGCAATATTTCCCATATGCACTTTTG<br>AGAAGAGCCCGCCCTTGTGGGGGGTTCGTCACCCAACATCTCTCGGTGCCGCGGGACGGACCGAGAG<br>GCAAACGGAGACATT <b>ATG</b> AATATCGAAAAATATACA |
| BAB2_1107,<br>BAB_RS31625                    | GATCACCTATAAACCTCTGGGATGATGTTGAAATGCAGTTGCATCAACATGATCCCGGGCATTTTTTG<br>CTTATGAATAACAGAATACTCGTACCTCCCTTTTGAAATGACCGCGAATTGATGTGGTAAATGACAG<br>AGGCGGGGTTGAGAT <b>ATG</b> CCTAATTGGCCAATCAG    |
| <i>s7</i><br>(BAB1_0505,<br>BAB_RS18325)     | TCCTGTGCGTGGTCATAGTAATAAAGAAGGTAGCAAGACTCAGCAAAATGACAATGGCTTTCCATC<br>GCGGGCGGCCGCTTTGGCGCGAATTATCCGGTTAGGCTATCTGTTGGACTTGAAGCGACCATTTTTTT<br>CATTTTCAGGGCATGAAAATCTGTACCTCTATT                |
| BAB1_1022,<br>BAB_RS20820                    | TTCGTGGGGTTATCATCACAGGCAAGGGCTGATGGAGGCTGGCGCCCATCATATCCTGGAAAAGCCT<br>TCCGATCTTCATGCTCTATTGCTGGAAATGGAAGAATTCTGAGCCTCGCCCTTTGAAATCCGTGACAC<br>GGGACTGGATAATTC <b>ATG</b> CGTGACATTTTGAGCGAT   |

---

|                                             |                                                                                                                                                                                      |
|---------------------------------------------|--------------------------------------------------------------------------------------------------------------------------------------------------------------------------------------|
| BAB1_1620,<br>BAB_RS23635                   | AGGGACGCCCCGTGCGCCAATTGTCCGCATAAGCCAAAAAATACACGATCTGGCCCAGGCGATGACA<br>AAGCGCGCACACTTTATACTGCTGCCATTAATTGACTAGAATTCAAAGGCCTCCTAATGAATGACCA<br>TTCCAAGGGGGGGCTTTATGAAGTGTTATCTTATTAAT |
| <i>fabG</i><br>(BAB1_2043,<br>BAB_RS25660)  | GCTCGATCCTTATTGCCGCGCTTACGATCACCCCAATCTCTACGTGGTCGATGCGTCGTTCTGCCAA<br>CATCGGCAGCGGTCAATCCGGCGCTGACCATCGCCGCGCAAGCCTTGCGCGTCGCAGACCGTATCA<br>AGCGGGAGGGTTTTGCATGAGCCGTCAAAGACCTGTA   |
| <i>fabF</i><br>(BAB1_0872,<br>BAB_RS20090)  | CGTTGGCGCAATTTCCTGCTGAAAGGCGAAGCCTTCGCCCCGCTGGATGCTTCGAAAAAGCCTGC<br>CAGTGGCGCGGTCAGCGAAGCCATTGTCACCACCATCGGGGCAACCCGCGCTGAAGGCGCAGCAA<br>AGCTGGTGAGAGCATAAGATGACGAAATATACAGACCAT    |
| BAB1_0320,<br>BAB_RS17460                   | TTAATTTACTCTTACGTCAATGTAACCTTTGCGAAGACAGTGAAACTCGACCACACTAAACAGCGAG<br>GGGCTATCCGGGGGCGGATGGCTGGGAGATGGGCGGGCGCCCTAGCGGCCTGCACAAAGGACGGA<br>GCGATCCGGGGAGAAGACATGGCAAAAAAGGTGACTGGG  |
| <i>cfa</i><br>(BAB1_0476,<br>BAB_RS18195)   | TGTTGCTTTGGCATTCTTCCAGGGCCGGTTGATTGACGGAAAACTGCCTGGAAATTTGACGGCAGA<br>GGGGCTTCTTTTGATAATGCCGCTGCCGGGCAGCAGCATGGATGTATGCACCTGCTTCGTTCCCAA<br>AGAGGAGATGGGGCCGATGTATGGAATGCTGCGTACA    |
| BAB1_1357,<br>BAB_RS22425                   | GTTTACCGTTCTCAATCGCGGTGTGACGCTTGGCACGCGCACCAAGGACGATGTGGATATGGATGAG<br>TTGCAAAGCCTGATGGCAGGCGGGCAGGAGCTTGCCGATCTTACCGCTGAACTGGGCGGGCGAGTA<br>TAACCGGAGAACATGGAATGGGCGGACAGTTGAAGGTT  |
| <i>nirK</i><br>(BAB2_0943,<br>BAB_RS30770)  | AATATAATTTAACTATCTGATTTTATTATGGAAATATTTCCATATCGAGCGCCTTATATTGATTGCGGT<br>CAAGGAAGCGCCATGCGGCATCGCCTAGAAAGGAGGGGACAGAGCCAATGGCTCTTGGTCCTATCG<br>CAAAGGAGAGAAACGATGGCCGACCAGATACAAGTC  |
| <i>norC</i><br>(BAB2_0955,<br>BAB_RS30825)  | CTGCATCTTTGCCTATTTCGCAAAGAAGGGTTCTGCGCGACCGATAGAATGGAAGCATCCCGCGGGG<br>CCGGCGAGGGGAATTGCCCGGCCGCAATTTCTCGGGGGATTGGCTGCCGAGCGATGGTTCCGGCC<br>AATGAAAGGACGAAGGGATGGCAGAACGCCTAACCAAG   |
| <i>nosZ</i><br>(BAB2_0928,<br>BAB_RS30695)  | CGAAAAATTTGCAGCCCCGAATGCACCTCTCGCAGCGGCTGCCGAACGTGGCGGCGGTCCAGCCAG<br>GCCTATCATCTCGGTCAAGGGAAAGCCGGTGAAACACCCGTCAATCCCGTCCCCGGCCCTGATTT<br>TTTCAAAGGAGAAAAAGTATGACTGAAGAAACCAGGAAA   |
| BAB2_0863,<br>BAB_RS30420                   | TACCTACGCAATTCGCAAGCCGCACTGGAAAAACGCCGAAGGGTCGGCCGATTTTGAGCCGTTCAA<br>CTGGGAAAAGGAAGGCCGGATGCCGGGTCCCAGCAAGCCGACGGCTGAAAAGCCCGTCCTGCAA<br>AAGCTATGGAGACATCTTAATGTCAAGCTCATCAGATGCG   |
| BAB1_0383,<br>BAB_RS17760                   | GGCCCATGCGCGTGAAATCTATTTGCAGGCTGGCCGCTCCCATGCCATGCCGCCGCCAACGTTACC<br>GGCGTGACGGACGAGGAACGCCAGCTTCTGGCCTCCTGGTATCAATCCGTGACGACAGGCCCAAAA<br>GAGGGGACCAAGACCGAATGACAAAGCTTCTCATCCG    |
| <i>hPr-K</i><br>(BAB1_2094,<br>BAB_RS25910) | CGATCAGCCGGCAGATCATCGAGGCGCATGGCGGCGCGCTGACGGCGGAAAAATATTACCGATCCGG<br>ATAAGCCGATATTTCAAGGGTGCCCGCTTATCGTTGATCTTCCGGCCAGCGCATGACCGTGAAA<br>AGTGGATATCTGAACCTGTGACGCCCCGAGGAGGAAAGA   |
| BAB1_2091,                                  | CGGGTTAAACGATTAAAAAAATTTCAAAAATTTTAAATCGATTAAATATTTGAATTTTCTCAATTAA                                                                                                                  |

---

---

|                                            |                                                                                                                                                                                              |
|--------------------------------------------|----------------------------------------------------------------------------------------------------------------------------------------------------------------------------------------------|
| BAB_RS25895                                | TCTGTTTCTGACTGCCATCCCCATGAAAGCCAAACCAGGGGGACGCATTTTTTAGTTAGTCAAACA<br>GACGGCGGAGACATC <b>AT</b> GAAAGAGACCGGCATCCAC                                                                          |
| <i>vjbR</i><br>(BAB2_0118,<br>BAB_RS26915) | AATTAAGTAATTGCCGGTTGCCAACGACTATATTTTTTTAAGTCACTAATAAGCGATTGAAGGCCTC<br>TGAGGGGAGGCGATTCTCTCGCAAGCAGTTATAGAGATACCAGAGCGAAGCCCGCATGGTTTCATC<br>ACCAAGGATATTTCCA <b>AT</b> GAGTCTTGATCTCGTTCAT  |
| <i>exoR</i><br>(BAB1_0891,<br>BAB_RS20180) | GAGCAGAAAAAATTCTGCCCGTTTGCTGTGCGCTCCGCCGAAGCGAGCTGAGCTTTTTTCCGTCAA<br>GATCGGGTCTCACTGTTGACGAAAAGCAGGCGCAACCTGCCTTTCATGATCTTTCCGTTCATATGA<br>AAGACCGGCGTTGT <b>GAT</b> GCGTAGTCGCAGTTTTTCA    |
| <i>ompR</i><br>(BAB2_0762,<br>BAB_RS29960) | AACGCCTATGCGGGGAAATCAGCCAGTAGGCTGATTTCTGATCCGGCTTCGATGGAAAATGCGCCA<br>AAACAAATAGTTAGAGCAGTTCGCGCGTTTCTGTAAAAATAGGAAACGCTACAATACCCACCCCAA<br>CGGCAATGGAACAGCAAA <b>TTG</b> AAAGAAGACGCCCACATT |
| <i>motB</i><br>(BAB2_1103,<br>BAB_RS31605) | TCTGGAAGCATTGCAGGCCCATGGGGTGCTTTTGCCCTCCGGTTGCCGCTTTTCAGAGACGGCATCG<br>AACGAACTTTCTTTTCTTTGGCGAACGGATGCTCGAAACGCGCATCGCGCCGCTTCTTGAAGAAC<br>TGAAGGCTGCGGTGAA <b>AT</b> GAAACATTGAGCCCGAAACG  |
| <i>malK</i><br>(BAB1_0241,<br>BAB_RS17050) | TCGATTATACGGCCGAGTTCACCATCGATTGGCGCGGCATGTGCGCGCTTGCCGTGGTGATGATTGTT<br>CCGGCGCTGGCGCTCACCTTCGTCATCCAGAAACACCTCGTTTCCGGCCTGACTTTCGGCGCGGTTA<br>AAGGTTGAAATTGTA <b>AT</b> TGGCACAGCTTCCATCAAA |
| BAB1_1601,<br>BAB_RS23550                  | TTCGTTGCTTAACAGAAGGACGCTGTCGTTTCGTTCAAGGCAAATGACGACTATTGGGGCGGACGCC<br>CGAAGATCGACGATCTGGTCTTCGCGATCACGACCGATCCTGCTGTTGCGCGCGAGAAGCTCAAGGC<br>CGGCGAATGCCAGCTT <b>AT</b> GTCTATCCGGCTCCGGCG  |
| BAB1_1397,<br>BAB_RS22600                  | AATATCTTTATTCCATAGAAACATGGGAAAAGCTGTTCTCGTCCGCTGAAAATTGCGCTAAACCACC<br>ATCGTCAATAGCTGGGTTTGAGGAGACTTCGCTATTACAAGTTCGCTGCAAGAGGCGGATAGTCTA<br>ATTGAGGAGACTTCCCG <b>T</b> GTTGGACTGGGAAAATGTA  |
| BAB1_0666,<br>BAB_RS19125                  | TCTGCCGCATTATCTCTTTTTTGAGATACACCCCGCTTGCTCCATTGCGGTGGCAAGACTATGGTGC<br>AACGCCTCACGCATAATCCGATGAAGCCCGAAGGGGGCTTTGCTGCGTGGGGTCCCGTCTATCTGTT<br>TCAGGAGTTCAGAA <b>T</b> GCTGAAGGGCTCAATTACCG   |

---
