# Supplementary material for: Prediction of Structure and Molecular Interaction with DNA of BvrR, a Virulence-Associated Regulatory Protein of Brucella
Source: MDPI journal article supplement (doi:10.3390/molecules24173137), 2019-08-29
Supplement: s1 [file s1]

## Supplemental Information S13

### FireDock results of BvrR interacting with DNA

Frame 5523

| <b>Global Energy<br/>(Kcal/mol)</b> | <b>Attractive VdW<br/>(Kcal/mol)</b> | <b>Repulsive VdW<br/>(Kcal/mol)</b> | <b>ACE (Kcal/mol)</b> |
|-------------------------------------|--------------------------------------|-------------------------------------|-----------------------|
| -15.44                              | -30.65                               | 9.58                                | 7.66                  |

Frame 7507

| <b>Global Energy<br/>(Kcal/mol)</b> | <b>Attractive VdW<br/>(Kcal/mol)</b> | <b>Repulsive VdW<br/>(Kcal/mol)</b> | <b>ACE (Kcal/mol)</b> |
|-------------------------------------|--------------------------------------|-------------------------------------|-----------------------|
| -17.19                              | -22.90                               | 5.55                                | 2.71                  |

BvrR with DNA with different motif sequence

| <b>Global Energy<br/>(Kcal/mol)</b> | <b>Attractive VdW<br/>(Kcal/mol)</b> | <b>Repulsive VdW<br/>(Kcal/mol)</b> | <b>ACE (Kcal/mol)</b> |
|-------------------------------------|--------------------------------------|-------------------------------------|-----------------------|
| -2.91                               | -15.78                               | 6.16                                | 3.58                  |
