# Supplementary material for: Prediction of Structure and Molecular Interaction with DNA of BvrR, a Virulence-Associated Regulatory Protein of Brucella
Source: MDPI journal article supplement (doi:10.3390/molecules24173137), 2019-08-29
Supplement: s1 [file s1]

## Supplemental information S2

### COACH results for BvrR

#### TM-SITE results for BvrR

| Rank | C-score <sup>a</sup> | Cluster size <sup>b</sup> | Rep Templ <sup>c</sup>        | Mult Templ <sup>d</sup>  | Ligands <sup>e</sup>                                                        | Predicted binding site residues |
|------|----------------------|---------------------------|-------------------------------|--------------------------|-----------------------------------------------------------------------------|---------------------------------|
| 1    | 0.45                 | 12                        | <a href="#">3breA_BS01_MG</a> | <a href="#">Download</a> | <a href="#">MG(7)</a> , <a href="#">MN(3)</a> , <a href="#">BEF(2)</a> ,... | 14,15,16,58,60,107              |
| 2    | 0.19                 | 2                         | <a href="#">4yn8A_BS01_MG</a> | <a href="#">Download</a> | <a href="#">MG(2)</a>                                                       | 14,16,58,109                    |
| 3    | 0.18                 | 2                         | <a href="#">1zdmA_BS02_XE</a> | <a href="#">Download</a> | <a href="#">XE(2)</a>                                                       | 13,14,23,56,57,58,84            |
| 4    | 0.16                 | 1                         | <a href="#">3gwgA_BS01_MG</a> | <a href="#">Download</a> | <a href="#">MG(1)</a>                                                       | 19,107                          |

- C-score:** is the confidence score of predicted binding site. C-score ranges [0-1], where a higher score indicates a more reliable prediction.
- Cluster size:** is the number of templates in a cluster.
- Rep Templ** presents a representative ligand-protein template from a cluster. The template names are: (PDBIDchain)\_(BioLiP site #)\_(Ligand ID).
- Mult Templ:** provides all ligand-protein complex structures in a cluster, where each ligand is separated by "TER".
- Ligands:** lists all ligands in a cluster. The numbers in the parentheses are the appearing times of the corresponding ligands.

#### S-SITE results for BvrR

| Rank | C-score <sup>a</sup> | Cluster size <sup>b</sup> | Templates <sup>c</sup> | Ligands <sup>d</sup>                                                           | Predicted binding site residues                                             |
|------|----------------------|---------------------------|------------------------|--------------------------------------------------------------------------------|-----------------------------------------------------------------------------|
| 1    | 0.44                 | 101                       | <a href="#">List</a>   | <a href="#">MG(39)</a> , <a href="#">BEF(29)</a> , <a href="#">MN(20)</a> ,... | 14,15,16,58,59,60,85,86,107                                                 |
| 2    | 0.18                 | 18                        | <a href="#">List</a>   | <a href="#">III(15)</a> , <a href="#">LA(1)</a> , <a href="#">SO4(1)</a> ,...  | 88,89,90,91,93,94,97,101,102,103,104,105,106,113,117,120                    |
| 3    | 0.12                 | 2                         | <a href="#">List</a>   | <a href="#">NUC(2)</a>                                                         | 186,203,206,210,213,228,230,231,234                                         |
| 4    | 0.12                 | 6                         | <a href="#">List</a>   | <a href="#">NUC(4)</a> , <a href="#">GLY(1)</a> , <a href="#">AZI(1)</a>       | 134,167,168,169,189,190,191,192,194,195,199,200,201,203,204,207,208,211,230 |
| 5    | 0.12                 | 1                         | <a href="#">List</a>   | <a href="#">BF2(1)</a>                                                         | 124                                                                         |

- C-score:** is the confidence score of predicted binding site. C-score ranges [0-1], where a higher score indicates a more reliable prediction.
- Cluster size:** is the number of templates in a cluster.
- Templates:** presents the list of templates in a cluster. The template names are: (PDBIDchain)\_(BioLiP site #)\_(Ligand ID).
- Ligands:** lists ligands in a cluster. The numbers in the parentheses are the appearing times for the corresponding ligands.

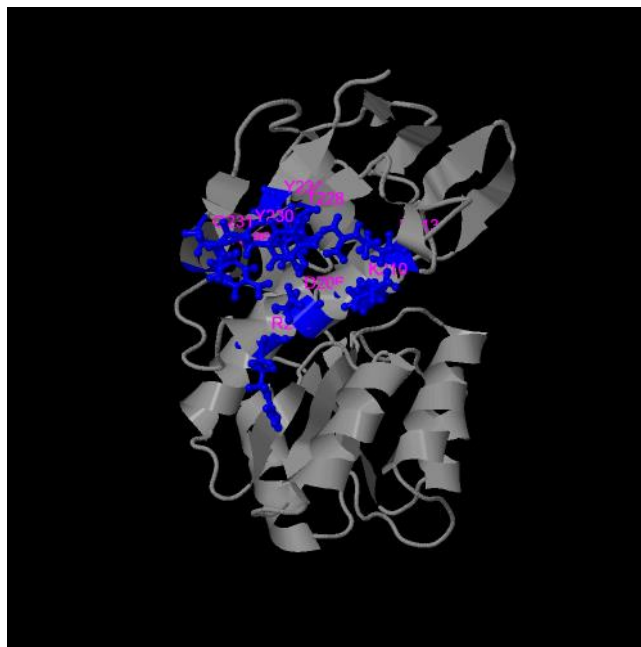

**Figure S2.1 First Nucleic Acid binding site found with S-SITE.**

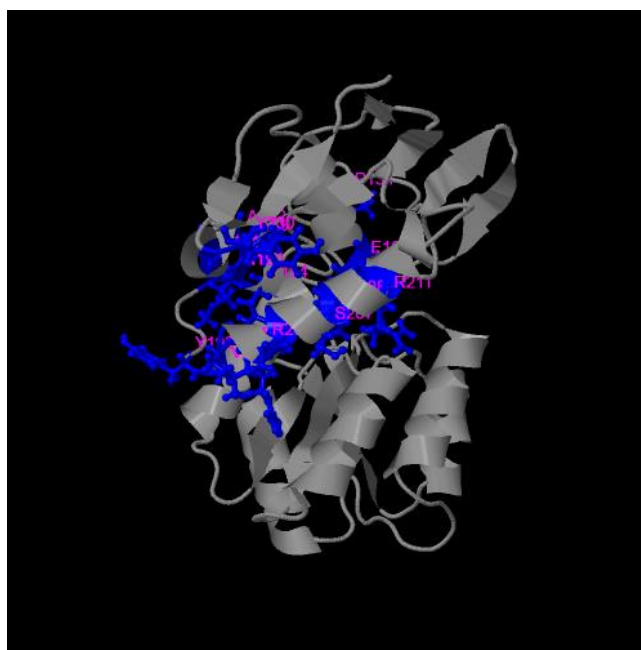

**Figure S2.2 Second Nucleic Acid binding site found with S-SITE.**

## COFACTOR results for BvrR

### Molecular Function (MF)

| GO term                    | Cscore <sup>GO</sup> | GO Name                                  |
|----------------------------|----------------------|------------------------------------------|
| <a href="#">GO:1901363</a> | 0.94                 | heterocyclic compound binding            |
| <a href="#">GO:0097159</a> | 0.94                 | organic cyclic compound binding          |
| <a href="#">GO:0003676</a> | 0.89                 | nucleic acid binding                     |
| <a href="#">GO:0003677</a> | 0.87                 | DNA binding                              |
| <a href="#">GO:0004871</a> | 0.79                 | signal transducer activity               |
| <a href="#">GO:0000156</a> | 0.73                 | phosphorelay response regulator activity |

Download [full result](#) of the above consensus prediction.

Click the graph to show a high resolution version.

- (a) Cscore<sup>GO</sup> is the confidence score of predicted GO terms. Cscore<sup>GO</sup> values range in between [0-1]; where a higher value indicates a better confidence in predicting the function using the template.
- (b) The graph shows the predicted terms within the Gene Ontology hierarchy for Molecular Function. Confidently predicted terms are color coded by Cscore<sup>GO</sup>:

[0.4,0.5] [0.5,0.6] [0.6,0.7] [0.7,0.8] [0.8,0.9] [0.9,1.0]

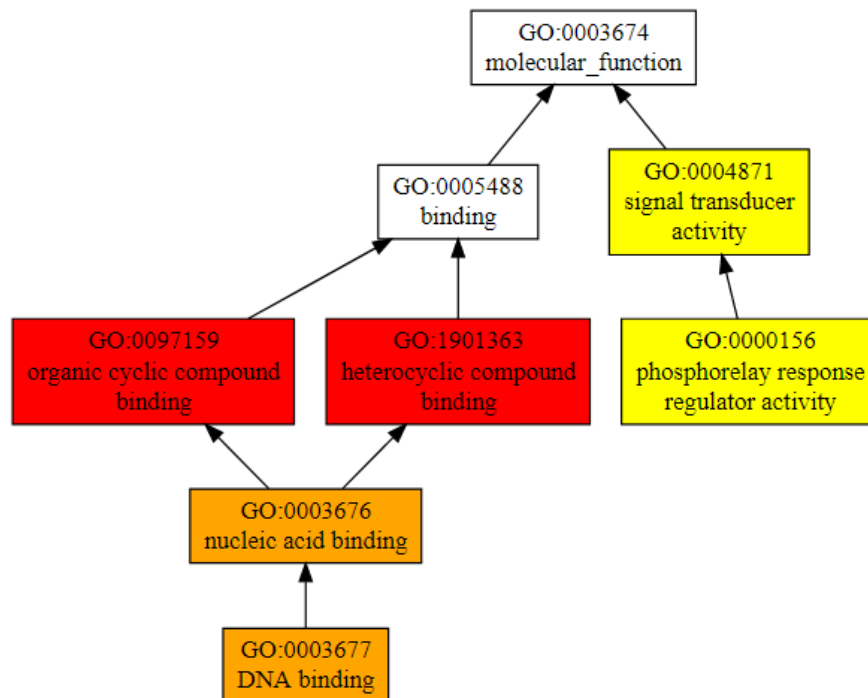

## Biological Process (BP)

| GO term                    | Cscore <sup>GO</sup> | GO Name                                                   |
|----------------------------|----------------------|-----------------------------------------------------------|
| <a href="#">GO:0065007</a> | 0.97                 | biological regulation                                     |
| <a href="#">GO:0050789</a> | 0.97                 | regulation of biological process                          |
| <a href="#">GO:0050794</a> | 0.96                 | regulation of cellular process                            |
| <a href="#">GO:0009987</a> | 0.91                 | cellular process                                          |
| <a href="#">GO:0007165</a> | 0.89                 | signal transduction                                       |
| <a href="#">GO:0000160</a> | 0.88                 | phosphorelay signal transduction system                   |
| <a href="#">GO:0008152</a> | 0.71                 | metabolic process                                         |
| <a href="#">GO:0044237</a> | 0.70                 | cellular metabolic process                                |
| <a href="#">GO:0071704</a> | 0.67                 | organic substance metabolic process                       |
| <a href="#">GO:0044238</a> | 0.61                 | primary metabolic process                                 |
| <a href="#">GO:0019222</a> | 0.58                 | regulation of metabolic process                           |
| <a href="#">GO:0006807</a> | 0.58                 | nitrogen compound metabolic process                       |
| <a href="#">GO:0031323</a> | 0.56                 | regulation of cellular metabolic process                  |
| <a href="#">GO:0080090</a> | 0.55                 | regulation of primary metabolic process                   |
| <a href="#">GO:0060255</a> | 0.55                 | regulation of macromolecule metabolic process             |
| <a href="#">GO:0009889</a> | 0.54                 | regulation of biosynthetic process                        |
| <a href="#">GO:0051171</a> | 0.53                 | regulation of nitrogen compound metabolic process         |
| <a href="#">GO:0031326</a> | 0.53                 | regulation of cellular biosynthetic process               |
| <a href="#">GO:0034641</a> | 0.52                 | cellular nitrogen compound metabolic process              |
| <a href="#">GO:0010468</a> | 0.52                 | regulation of gene expression                             |
| <a href="#">GO:2000112</a> | 0.51                 | regulation of cellular macromolecule biosynthetic process |
| <a href="#">GO:0006355</a> | 0.50                 | regulation of transcription, DNA-templated                |

Download [full result](#) of the above consensus prediction.

Click the graph to show a high resolution version.

(a) Cscore<sup>GO</sup> is the confidence score of predicted GO terms. Cscore<sup>GO</sup> values range in between [0-1]; where a higher value indicates a better confidence in predicting the function using the template.

(b) The graph shows the predicted terms within the Gene Ontology hierarchy for Biological Process. Confidently predicted terms are color coded by Cscore<sup>GO</sup>.

[0.4,0.5] [0.5,0.6] [0.6,0.7] [0.7,0.8] [0.8,0.9] [0.9,1.0]

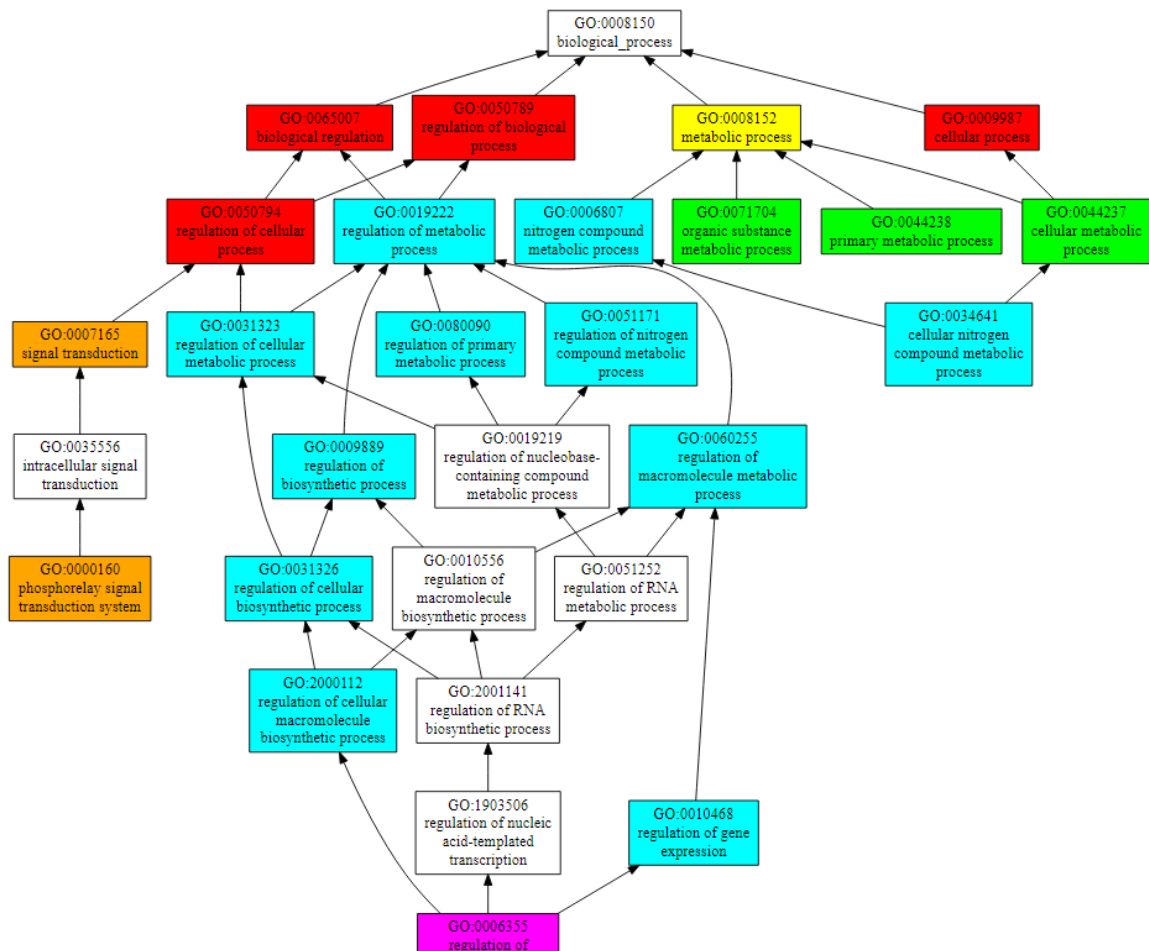

# CATH results for BvrR

12/12/2018

CATH: PDB search results

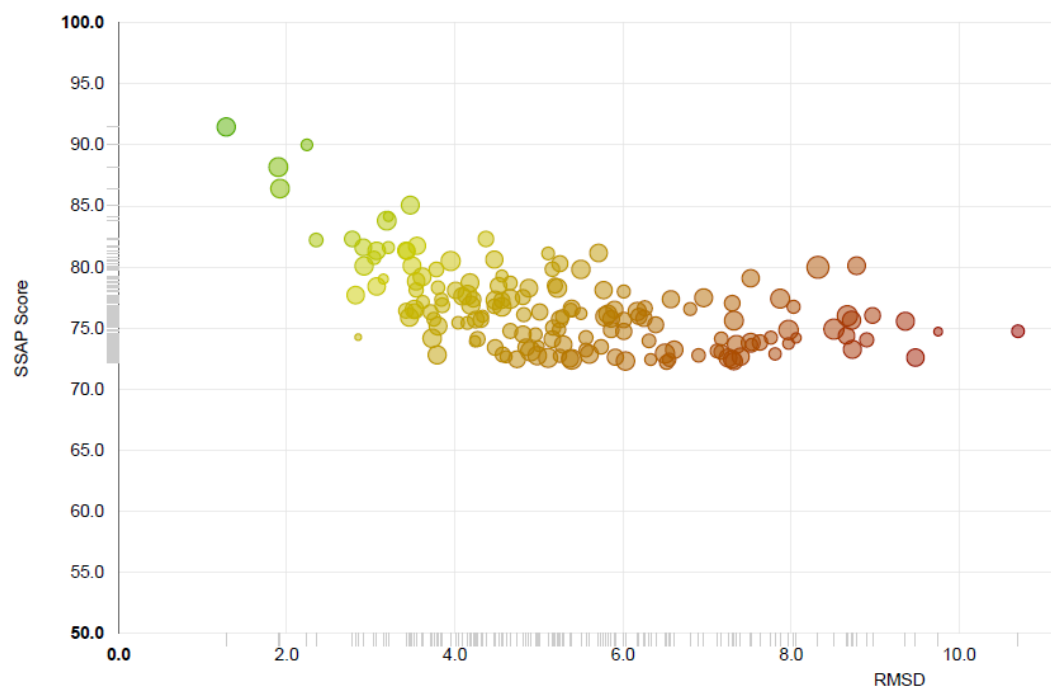

| Domain                  | Length<br>(AA<br>residues) | Superfamily                   | RMSD<br>(Å) | SSAP<br>Score<br>(0-<br>100) | Hits             | Actions              |
|-------------------------|----------------------------|-------------------------------|-------------|------------------------------|------------------|----------------------|
| <a href="#">3w9sB00</a> | 117                        | <a href="#">3.40.50.2300</a>  | 1.3         | 91.5                         | 0 50 100 150 239 | Show related domains |
| <a href="#">3c97A01</a> | 57                         | <a href="#">3.40.50.12330</a> | 2.2         | 90.0                         | 0 50 100 150 239 | Show related domains |
| <a href="#">3hzhA00</a> | 133                        | <a href="#">3.40.50.2300</a>  | 1.9         | 88.2                         | 0 50 100 150 239 | Show related domains |
| <a href="#">1a2oA01</a> | 133                        | <a href="#">3.40.50.2300</a>  | 1.9         | 86.4                         | 0 50 100 150 239 | Show related domains |
| <a href="#">3fkqA01</a> | 115                        | <a href="#">3.40.50.10850</a> | 3.5         | 85.1                         | 0 50 100 150 239 | Show related domains |
| <a href="#">4mloA02</a> | 46                         | <a href="#">1.10.10.1310</a>  | 3.2         | 84.1                         | 0 50 100 150 239 | Show related domains |
| <a href="#">4mloA02</a> | 46                         | <a href="#">1.10.10.1310</a>  | 3.2         | 84.1                         | 0 50 100 150 239 | Show related domains |
