# Supplementary material for: Prediction of Structure and Molecular Interaction with DNA of BvrR, a Virulence-Associated Regulatory Protein of Brucella
Source: MDPI journal article supplement (doi:10.3390/molecules24173137), 2019-08-29
Supplement: s1 [file s1]

## Supplemental Information S10

### HDOCK results for BvrR docked to DNA

#### Your HDOCK results for job *BvrR*

NOTE: No template was used for the **Ligand** Molecule!

You may **bookmark this page** and come back later to view the results.

##### Template Information

| Molecule | PDB ID               | Chain ID | Align_length | Coverage | Seq_ID (%) |
|----------|----------------------|----------|--------------|----------|------------|
| Receptor | <a href="#">4B09</a> | A        | 230          | 0.962    | 37.8       |
| Ligand   |                      |          |              |          |            |

##### Summary of the top 10 models

| Rank            | 1       | 2       | 3       | 4       | 5       | 6       | 7       | 8       | 9       | 10      |
|-----------------|---------|---------|---------|---------|---------|---------|---------|---------|---------|---------|
| Docking Score   | -485.79 | -484.78 | -481.22 | -458.31 | -453.66 | -450.74 | -448.30 | -447.17 | -446.14 | -440.93 |
| Ligand rmsd (Å) | 108.93  | 142.58  | 91.94   | 89.52   | 144.00  | 90.35   | 126.84  | 91.31   | 138.27  | 128.13  |

- (a) Row 1: The ranks of the models.
- (b) Row 2: The docking energy scores.
- (c) Row 3: The ligand RMSDs from the input structures or modeled structures by homology modeling.
